# Supplementary material for: Initial decrease in the ambient dose equivalent rate after the Fukushima accident and its difference from Chernobyl
Source: PubMed Central journal article supplement (PMC7051962; doi:10.1038/s41598-020-60847-0), 2020-03-02
Supplement: 41598_2020_60847_MOESM1_ESM.pdf [file 41598_2020_60847_MOESM1_ESM.pdf]

1 **Initial decrease in ambient dose equivalent rate after the Fukushima accident and its difference from the Chernobyl.**

2 Kazuya Yoshimura<sup>1\*</sup>, Jun Saegusa<sup>2</sup>, Yukihiisa Sanada<sup>1</sup>

3 <sup>1</sup>Fukushima Environmental Safety Center, Japan Atomic Energy Agency, 45-169 Sukakeba, Minamisoma, Fukushima 975-0036, Japan.

4 <sup>2</sup>Collaborative Laboratories for Advanced Decommissioning Science, Japan Atomic Energy Agency, 4-33, Muramatsu, Tokai-mura,  
5 Ibaraki 319-1194, Japan.

6

7 **Supplementary Table S1.** Descriptions of Dataset\_Unpaved. The column of “No” indicates the monitoring sites numbered in the  
8 monitoring program by MEXT. The maximum and minimum  $dH^*(10) dt^{-1}$  ( $\mu\text{Sv hr}^{-1}$ ) were observed during the monitoring period in  
9 2011. Circle in the column of “Evacuation Zone” indicates the monitoring sites subjected to be evacuation zone at the end of 2011.

| No  | Latitude    | Longitude    | Land type (proportion)                            | Monitoring period in 2011 | $dH^*(10) dt^{-1}$<br>( $\mu\text{Sv hr}^{-1}$ ) |      | $^{137}\text{Cs}$ activity<br>per unit area<br>( $\text{kBq m}^{-2}$ ) | Evacuation<br>zone |
|-----|-------------|--------------|---------------------------------------------------|---------------------------|--------------------------------------------------|------|------------------------------------------------------------------------|--------------------|
|     |             |              |                                                   |                           | Max.                                             | Min. |                                                                        |                    |
| 23  | 37°30'30.3" | 140°37'30.3" | Paved surface (50), Grassland (50)                | March 16 - December 28    | 5.0                                              | 0.3  | 109                                                                    |                    |
| 31  | 37°33'56.2" | 140°44'37.8" | Paved surface (50), Grassland (20), Forest (30)   | March 16 - December 28    | 66                                               | 4.7  | 1590                                                                   | ○                  |
| 33  | 37°36'45.5" | 140°44'56.8" | Paved surface (50), Grassland (50)                | March 16 - December 24    | 110                                              | 7.5  | 1938                                                                   | ○                  |
| 37  | 37°45'18.5" | 140°41'17.1" | Paved surface (45), Grassland (15), Forest (40)   | March 16 - December 24    | 4.7                                              | 2.2  | 436                                                                    |                    |
| 41  | 37°26'02.5" | 140°48'06.3" | Paved surface (50), Forest (50)                   | March 16 - December 28    | 13.0                                             | 0.4  | 169                                                                    |                    |
| 44  | 37°10'34.3" | 140°57'17.3" | Paved surface (40), Bare ground (20), Forest (40) | March 16 - December 28    | 19.0                                             | 0.2  | 94                                                                     |                    |
| 45  | 37°14'45.8" | 141°00'12.0" | Paved surface (40), Grassland (60)                | March 16 - December 28    | 19.0                                             | 0.4  | 168                                                                    | ○                  |
| 46  | 37°35'09.5" | 140°42'40.9" | Paved surface (50), Grassland (50)                | March 17 - December 28    | 40                                               | 3.0  | 800                                                                    | ○                  |
| 81  | 37°35'04.3" | 140°45'24.3" | Paved surface (50), Grassland (15), Forest (35)   | March 24 - December 28    | 66                                               | 12   | 3002                                                                   | ○                  |
| 83  | 37°33'37.5" | 140°49'26.0" | Grassland (100)                                   | March 24 - December 28    | 110                                              | 28   | 4692                                                                   | ○                  |
| 181 | 37°22'33.3" | 140°45'15.9" | Paved surface (35), Grassland (50), River (15)    | May 20 - December 28      | 0.6                                              | 0.4  | 108                                                                    |                    |
| i10 | 37°44'15.3" | 140°42'13.1" | Paved surface (50), Grassland (50)                | April 25 - December 24    | 5.5                                              | 3.3  | 690                                                                    | ○                  |
| i20 | 37°40'26.4" | 140°46'41.4" | Paved surface (50), Grassland (50)                | April 26 - December 22    | 7.0                                              | 4.7  | 821                                                                    | ○                  |
| K3  | 37°31'23.9" | 140°44'52.6" | Paved surface (50), Grassland (50)                | April 25 - December 22    | 1.9                                              | 1.3  | 318                                                                    | ○                  |
| kw1 | 37°38'37.3" | 140°39'04.2" | Paved surface (50), Grassland (50)                | April 26 - December 28    | 1.6                                              | 0.9  | 204                                                                    |                    |
| kw3 | 37°36'05.3" | 140°38'12.2" | Paved surface (50), Grassland (50)                | April 26 - December 21    | 2.1                                              | 1.2  | 353                                                                    | ○                  |
| n1  | 37°35'50.0" | 140°45'10.9" | Paved surface (40), Grassland (50), Forest (10)   | April 27 - December 18    | 25                                               | 16   | 2709                                                                   | ○                  |
| n2  | 37°34'37.4" | 140°46'45.6" | Paved surface (50), Grassland (50)                | April 27 - December 18    | 24                                               | 15   | 3067                                                                   | ○                  |
| n3  | 37°34'57.9" | 140°47'36.8" | Paved surface (50), Grassland (50)                | April 27 - December 18    | 14                                               | 8.3  | 2544                                                                   | ○                  |
| n8  | 37°33'18.5" | 140°46'44.9" | Paved surface (30), Forest (60), River (10)       | April 27 - December 27    | 16                                               | 9.6  | 2306                                                                   | ○                  |
| n10 | 37°33'37.4" | 140°42'29.2" | Paved surface (50), Grassland (50)                | April 27 - December 27    | 2.2                                              | 1.3  | 387                                                                    | ○                  |
| 111 | 37°17'51.7" | 140°45'33.3" | Paved surface (50), Forest (50)                   | May 20 - December 28      | 0.8                                              | 0.4  | 144                                                                    |                    |
| 113 | 37°27'34.1" | 140°45'09.4" | Paved surface (50), Grassland (50)                | May 20 - December 28      | 1.5                                              | 0.8  | 205                                                                    |                    |
| 114 | 37°14'25.6" | 140°50'46.9" | Paved surface (40), Grassland (50), Forest (10)   | May 23 - December 28      | 1.5                                              | 1.0  | 233                                                                    |                    |



12 **Supplementary Table S2.** Descriptions of Dataset\_Paved.

| No. | Latitude    | Longitude    | Land type (proportion)                            | Monitoring period in 2011 | $dH^*(10) dt^{-1}$<br>( $\mu\text{Sv hr}^{-1}$ ) |      | $^{137}\text{Cs}$ activity<br>per unit area<br>( $\text{kBq m}^{-2}$ ) | Evacuation<br>zone |
|-----|-------------|--------------|---------------------------------------------------|---------------------------|--------------------------------------------------|------|------------------------------------------------------------------------|--------------------|
|     |             |              |                                                   |                           | Max.                                             | Min. |                                                                        |                    |
| 1   | 37°45'02.1" | 140°28'00.7" | Building (100)                                    | March 17 - December 24    | 8.5                                              | 0.3  | 186                                                                    |                    |
| 2   | 37°45'24.2" | 140°33'17.8" | Paved surface (80), Grassland (20)                | March 17 - December 28    | 18                                               | 0.9  | 369                                                                    |                    |
| 4   | 37°39'45.0" | 140°35'44.2" | Paved surface (100)                               | March 17 - December 28    | 6.7                                              | 0.3  | 180                                                                    |                    |
| 5   | 37°47'26.9" | 140°55'48.0" | Paved surface (100)                               | March 17 - December 28    | 7.5                                              | 0.3  | 56                                                                     |                    |
| 7   | 37°42'00.2" | 140°57'45.4" | Paved surface (75), Grassland (25)                | March 17 - December 28    | 5.0                                              | 0.3  | 82                                                                     |                    |
| 10  | 37°35'48.1" | 140°34'47.2" | Paved surface (75), Grassland (25)                | March 17 - December 28    | 5.2                                              | 0.3  | 185                                                                    |                    |
| 22  | 37°30'52.4" | 140°39'17.6" | Paved surface (75), Grassland (25)                | March 16 - December 28    | 26                                               | 0.2  | 129                                                                    |                    |
| 34  | 37°33'14.5" | 140°44'13.6" | Paved surface (75), Forest (25)                   | March 16 - December 28    | 25                                               | 3.4  | 738                                                                    | ○                  |
| 38  | 37°07'27.9" | 140°56'52.8" | Paved surface (70), Grassland (30)                | March 16 - December 28    | 2.5                                              | 0.2  | 93                                                                     |                    |
| 79  | 37°33'33.5" | 140°45'34.9" | Paved surface (90), Building (10)                 | March 20 - December 30    | 39                                               | 5.9  | 1838                                                                   | ○                  |
| 102 | 37°44'07.7" | 140°36'34.0" | Paved surface (50), Building (10), Grassland(40)  | April 7 - December 28     | 1.7                                              | 0.3  | 228                                                                    |                    |
| 104 | 37°30'11.6" | 140°45'49.8" | Paved surface (60), Forest (10), River (30)       | April 7 - December 28     | 3.4                                              | 0.6  | 381                                                                    | ○                  |
| 112 | 37°13'10.1" | 140°57'04.7" | Paved surface (65), Gravel (20), Forest (15)      | May 21 - December 28      | 1.2                                              | 0.5  | 129                                                                    |                    |
| i9  | 37°43'00.3" | 140°41'28.3" | Paved surface (60), Building (15), Grassland (25) | April 25 - December 24    | 5.9                                              | 3.4  | 783                                                                    | ○                  |
| K11 | 37°28'51.8" | 140°48'15.4" | Paved surface (60), Forest (40)                   | April 25 - December 24    | 2.1                                              | 1.3  | 289                                                                    | ○                  |
| ni2 | 37°34'47.1" | 140°40'30.6" | Paved surface (50), Building (25), Gravel (25)    | May 4 - December 28       | 1.0                                              | 0.6  | 208                                                                    |                    |

13

14
